# Supplementary material for: Defining the Sister Rat Mammary Tumor Cell Lines HH-16 cl.2/1 and HH-16.cl.4 as an In Vitro Cell Model for Erbb2
Source: PubMed Central journal article supplement (PMC3254647; doi:10.1371/journal.pone.0029923), 2012-01-10
Supplement: pone.0029923.s001.pdf [file pone.0029923.s001.pdf]

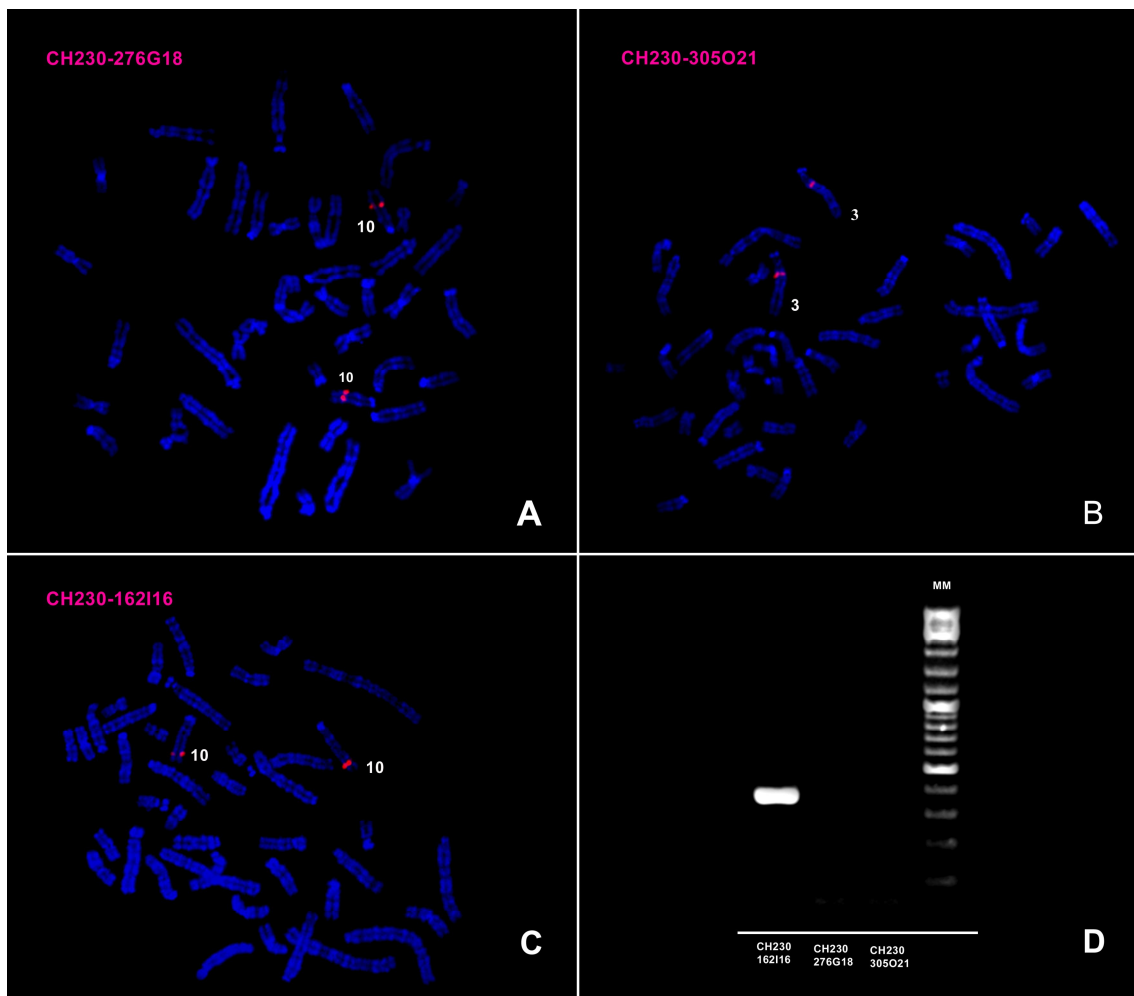

**Figure S1. Representative images of the *in situ* hybridization of putative *ErbB2* BAC clones onto RNO metaphases.** Both CH230-276G18 (A) and CH230-305O21 (B) hybridize in different locations than the *ErbB2* position determined by [24]. Only CH230-162I16 hybridizes at the cytogenetic position of *ErbB2* in *Rattus norvegicus* (10q32.1) (C). PCR amplification of *ErbB2* in the three clones (D). Only for CH230-162I16 BAC clone the expected 350 bp band is observed.
