# Supplementary material for: Defining the Sister Rat Mammary Tumor Cell Lines HH-16 cl.2/1 and HH-16.cl.4 as an In Vitro Cell Model for Erbb2
Source: PubMed Central journal article supplement (PMC3254647; doi:10.1371/journal.pone.0029923), 2012-01-10
Supplement: pone.0029923.s002.pdf [file pone.0029923.s002.pdf]

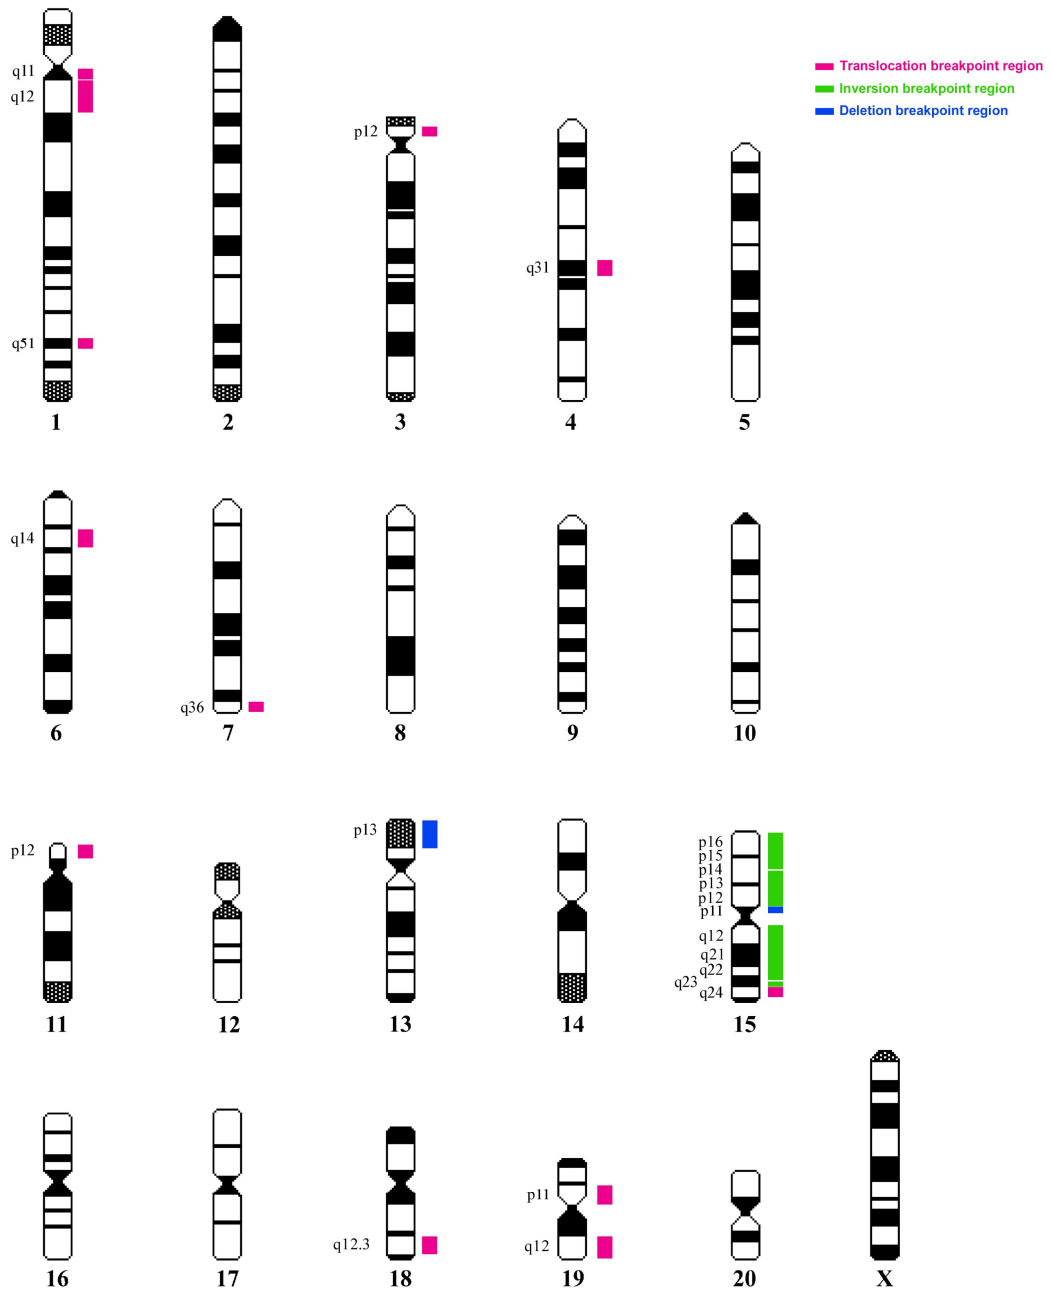

**Figure S2- Chromosomal location of the clonal rearrangements breakpoint regions in HH-16 cl.2/1 cell line.** Clonal rearrangements breakpoint regions in HH-16 cl.2/1 cell line are displayed in the rat ideogram [20]. Each type of rearrangement originated by the breakpoints is identified by a specific color.
