# Supplementary material for: Defining the Sister Rat Mammary Tumor Cell Lines HH-16 cl.2/1 and HH-16.cl.4 as an In Vitro Cell Model for Erbb2
Source: PubMed Central journal article supplement (PMC3254647; doi:10.1371/journal.pone.0029923), 2012-01-10
Supplement: pone.0029923.s003.pdf [file pone.0029923.s003.pdf]

**Table S1:** *In silico* analysis of breast cancer related genes present in the most representative rat breakpoint bands, and its correspondent human homolog.

| RNO               |              | Human        |                      |                                                                                  |
|-------------------|--------------|--------------|----------------------|----------------------------------------------------------------------------------|
| Breakpoint region | Gene         | Homolog gene | Cytogenetic position | Gene Definition                                                                  |
| 3p12              | <i>Rxra</i>  | <i>RXRA</i>  | 9q34.2               | retinoid X receptor, alpha                                                       |
|                   | <i>Ptges</i> | <i>PTGES</i> | 9q34.11              | prostaglandin E synthase                                                         |
| 6q14              | <i>Rhob</i>  | <i>RHOB</i>  | 2p24.1               | ras homolog gene family, member B                                                |
|                   | <i>Ncoa1</i> | <i>NCOA</i>  | 2p23.3               | nuclear receptor coactivator 1                                                   |
|                   | <i>Cad</i>   | <i>CAD</i>   | 2p23.3               | carbamoyl-phosphate synthetase 2, aspartate transcarbamylase, and dihydroorotase |
| 13p13             | <i>Bcl2</i>  | <i>BCL2</i>  | 18q21.33             | B-cell CLL/lymphoma 2                                                            |
| 15p12             | <i>Ctsb</i>  | <i>CTSB</i>  | 8p23.1               | cathepsin B                                                                      |
|                   | <i>Gnrh1</i> | <i>GNRH1</i> | 8p21.2               | gonadotropin-releasing hormone 1 (luteinizing-releasing hormone)                 |
|                   | <i>Ptk2b</i> | <i>PTK2B</i> | 8p21.2               | PTK2B protein tyrosine kinase 2 beta                                             |
| 15p13             | <i>Mmp14</i> | <i>MMP14</i> | 14q11.2              | matrix metalloproteinase 14 (membrane-inserted)                                  |
| 15p14             | <i>Bmp4</i>  | <i>BMP4</i>  | 14q22.2              | bone morphogenetic protein 4                                                     |
|                   | <i>Apex</i>  | <i>APEX</i>  | 14q11.2              | APEX nuclease (multifunctional DNA repair enzyme) 1                              |
|                   | <i>Ang1</i>  | <i>ANG1</i>  | 14q11.2              | angiogenin, ribonuclease, RNase A family, 5                                      |
|                   | <i>Anxa7</i> | <i>ANXA7</i> | 10q22.2              | annexin A7                                                                       |
| 19q12             | <i>Thrb</i>  | <i>THRB</i>  | 3p24.2               | thyroid hormone receptor, beta                                                   |
|                   | <i>Cdh1</i>  | <i>CDH1</i>  | 16q22.1              | Cadherin 1, type 1, E-cadherin (epithelial)                                      |
|                   | <i>Zfx3</i>  | <i>ZFX3</i>  | 16q22.2              | Zinc finger homeobox 3                                                           |
|                   | <i>Bcar1</i> | <i>BCAR1</i> | 16q23.1              | Breast cancer anti-estrogen resistance 1                                         |
|                   | <i>Cdh13</i> | <i>CDH13</i> | 16q23.3              | Cadherin 13, H-cadherin (heart)                                                  |
